# Supplementary material for: A tumor-targeting and lysosome-specific two-photon fluorescent probe for imaging pH changes in living cells
Source: Royal Society of Chemistry journal article supplement (doi:10.1039/c6tb02957d), 2016-12-28
Supplement: c6tb02957d1.pdf [file c6tb02957d1.pdf]

*Supporting information for*

**A tumor-targeting and lysosome-specific two-photon  
fluorescent probe for imaging pH changes in living cells**

Baoli Dong, Xuezhen Song, Xiuqi Kong, Chao Wang, Nan Zhang and Weiyang Lin\*

Institute of Fluorescent Probes for Biological Imaging, School of Materials Science and  
Engineering, School of Chemistry and Chemical Engineering, University of Jinan, Jinan, Shandong  
250022, P.R. China

E-mail: [weiyanglin2013@163.com](mailto:weiyanglin2013@163.com)

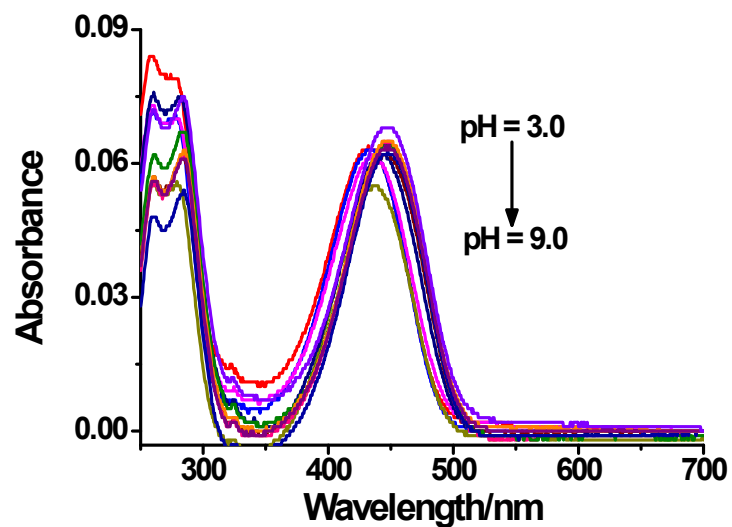

**Fig. S1** UV-Vis absorption spectra of 5  $\mu\text{M}$  BN-lys in the B-R buffer (5% EtOH) solution at different pH values.

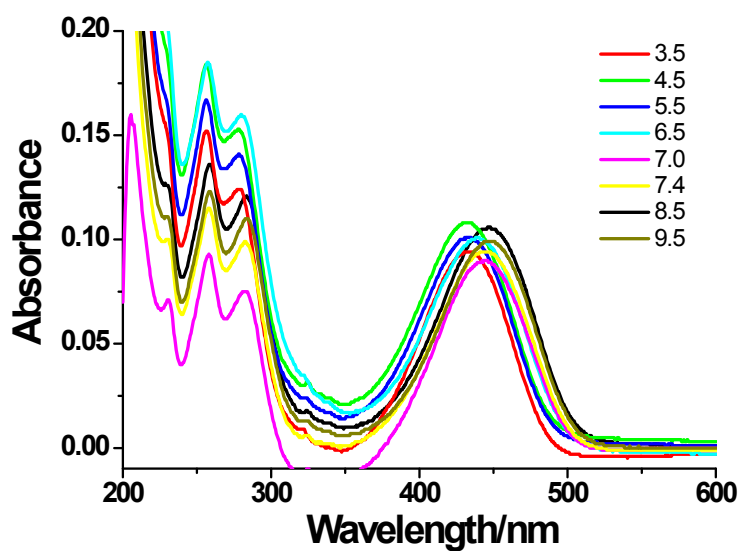

**Fig. S2** UV-Vis absorption spectra of 5  $\mu\text{M}$  NA-lys in the B-R buffer (5% EtOH) solution at different pH values

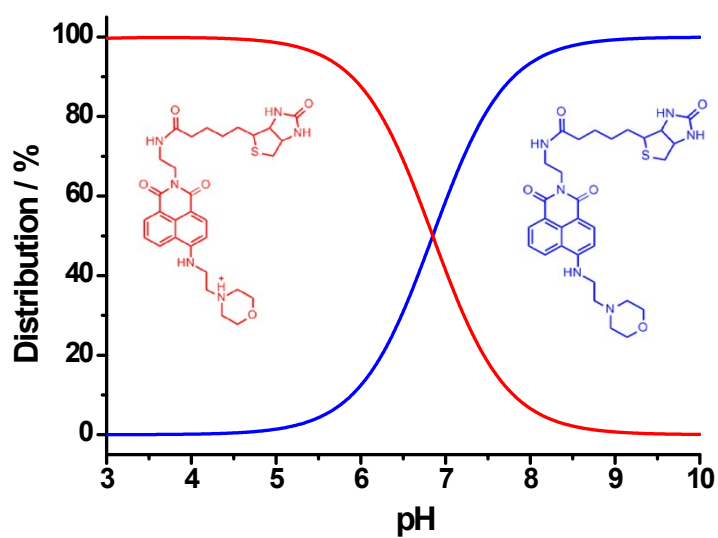

**Fig. S3** Distribution of **BN-lys** and its protonated species at various pH values calculated by MarvinSketch software using macro mode and dynamic acid/base prefix at 298 K.

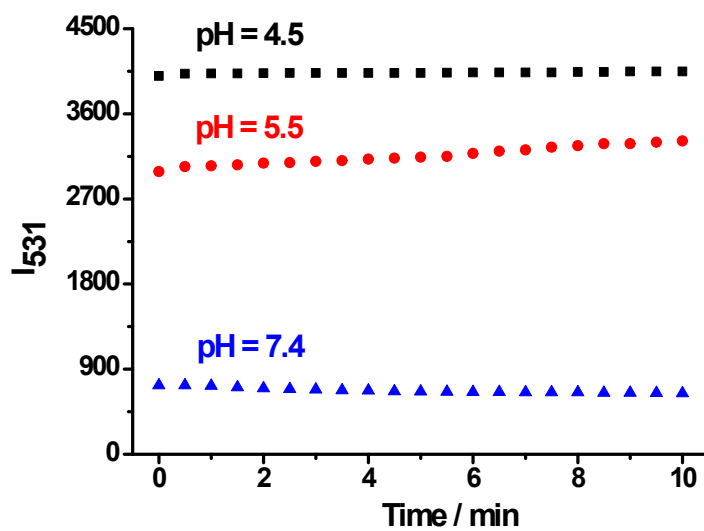

**Fig. S4** Time-dependent fluorescence intensities ( $I_{531}$ ) of **BN-lys** in B-R buffer solutions (5% MeOH) at pH 4.5, 5.5 and 7.4.  $\lambda_{\text{ex}} = 445$  nm.

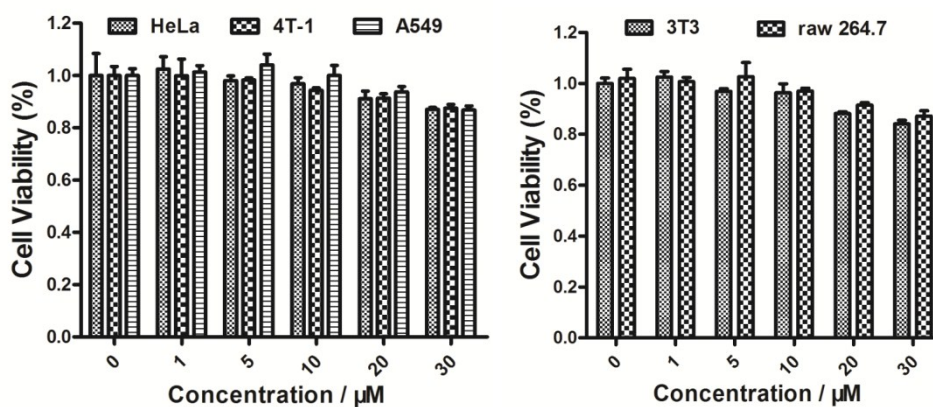

**Fig. S5** Survival of HeLa, A549, 4T1, NIH 3T3 and Raw264.7 cells in the presence of BN-lys at various concentrations measured using MTT assay.

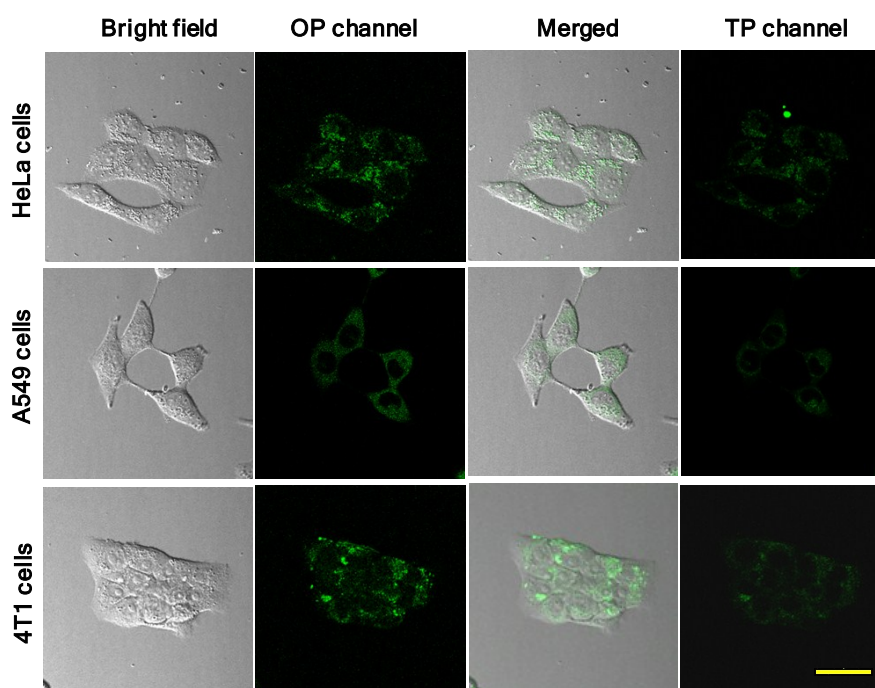

**Fig. S6** Fluorescence images for 10  $\mu\text{M}$  BN-lys in HeLa cells, A549 cells and NIH 3T3 cells pretreated 2 mM biotin. OP green channel: one-photon emission at 500-550 nm with excitation at 488 nm; TP green channel: two-photon emission at 500-550 nm with excitation at 760 nm. Scale bar = 20  $\mu\text{m}$ .

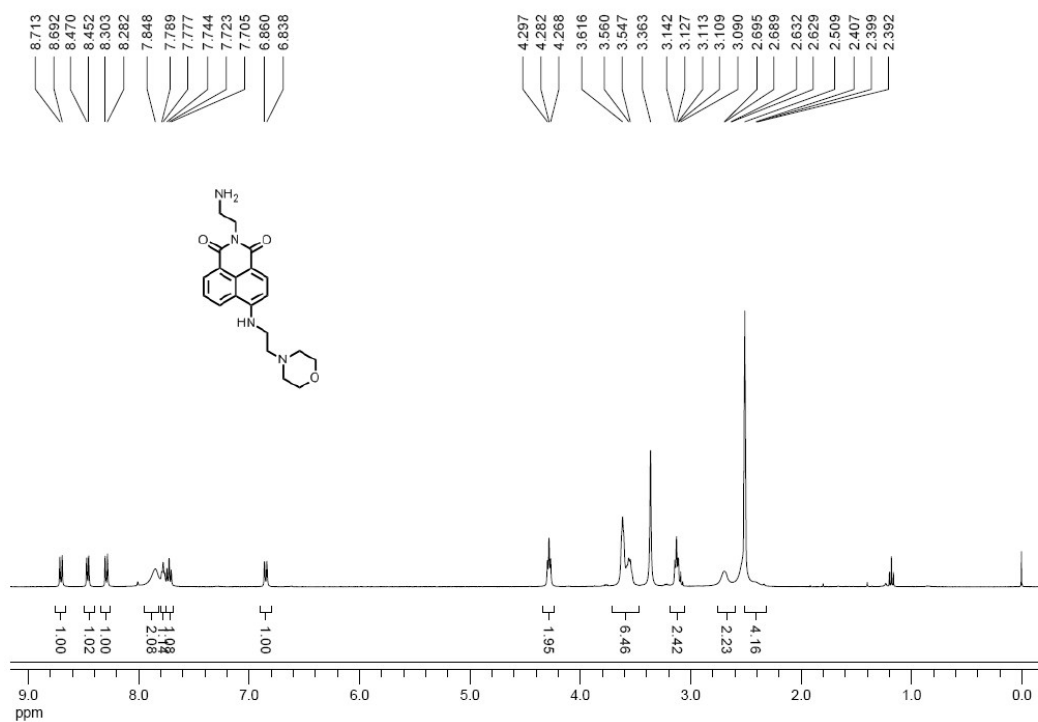

**Fig. S7** <sup>1</sup>H NMR spectrum of compound 2.

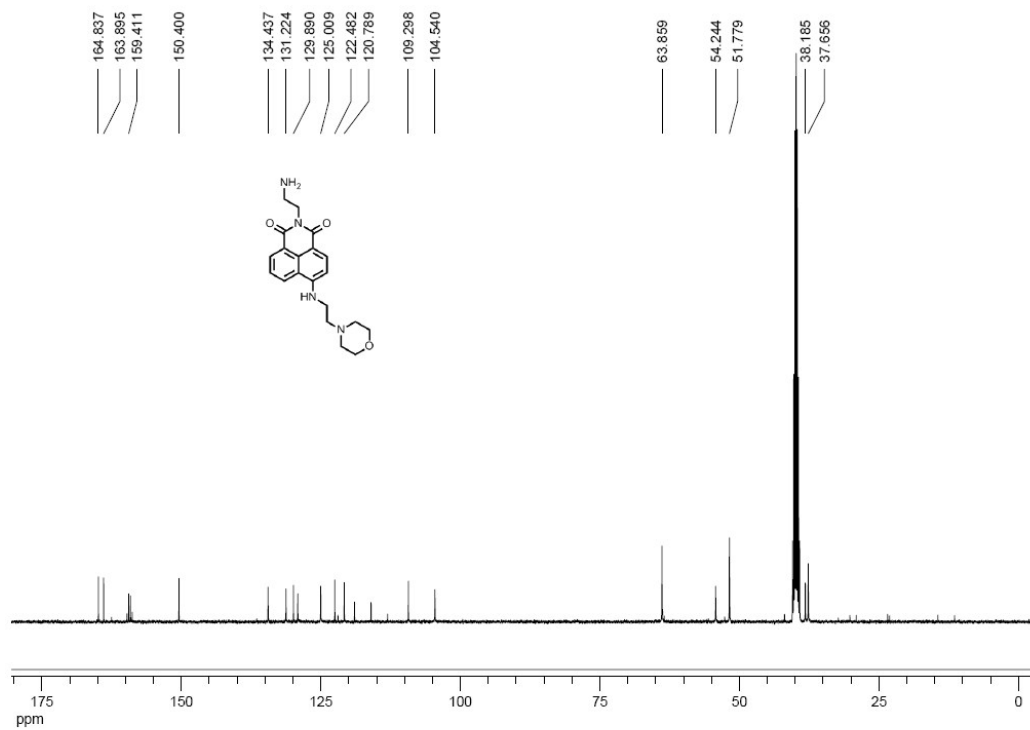

**Fig. S8** <sup>13</sup>C NMR spectrum of compound 2.

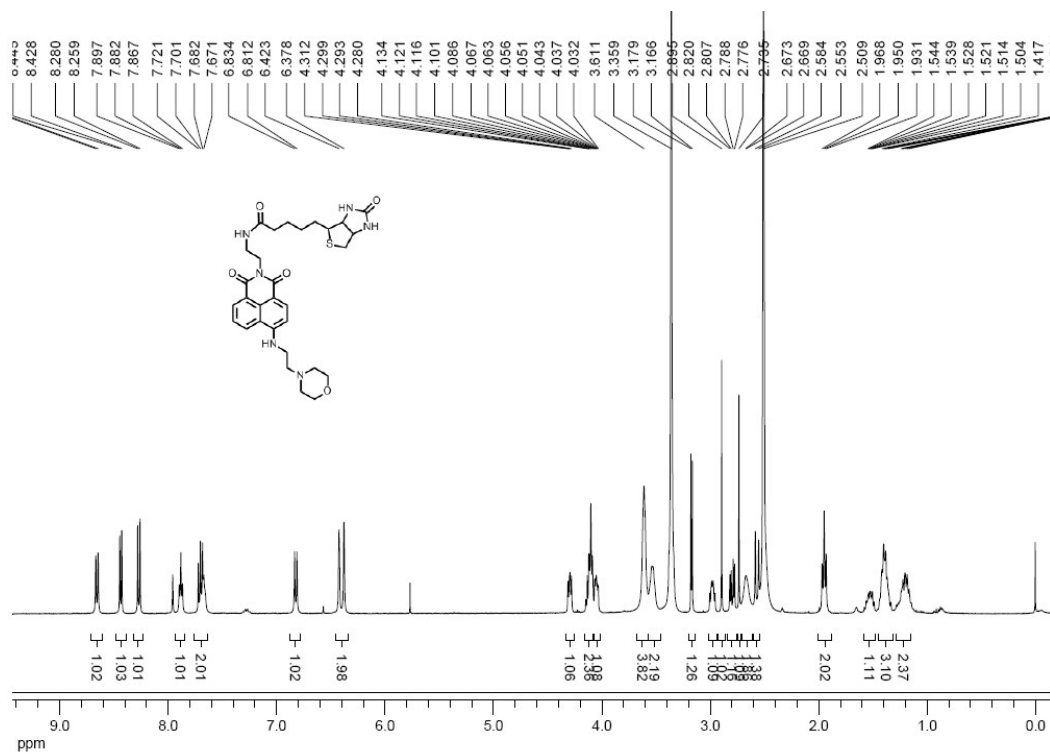

Fig. S9 <sup>1</sup>H NMR spectrum of BN-lys.

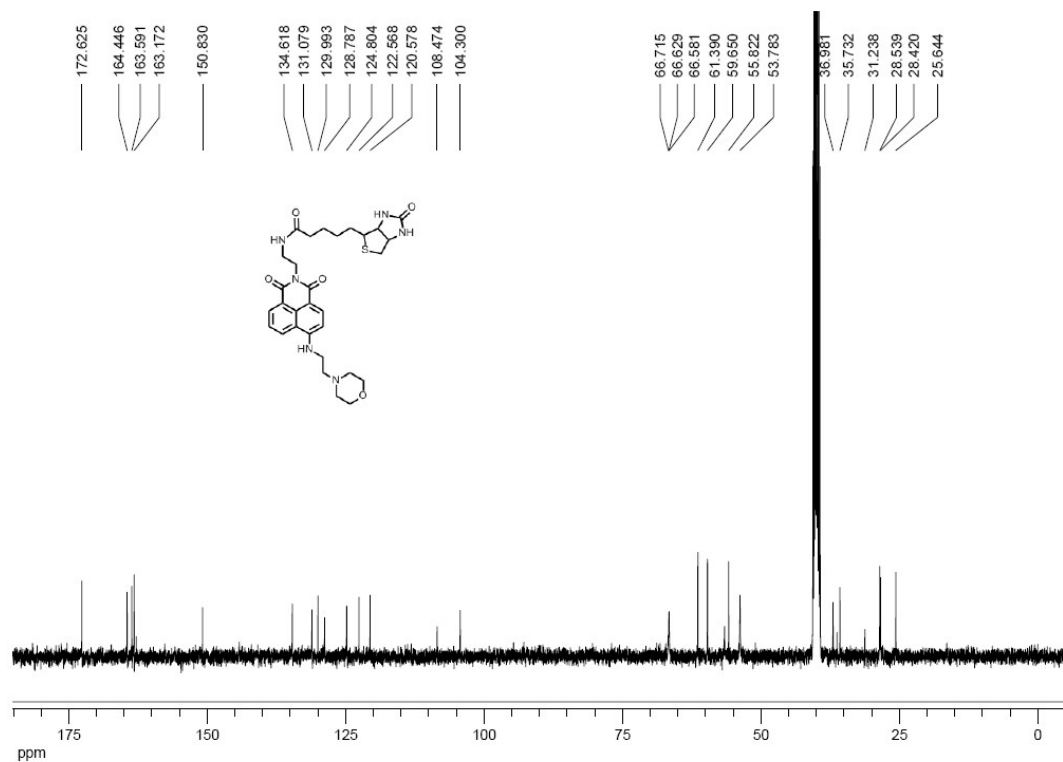

Fig. S10 <sup>13</sup>C NMR spectrum of BN-lys.

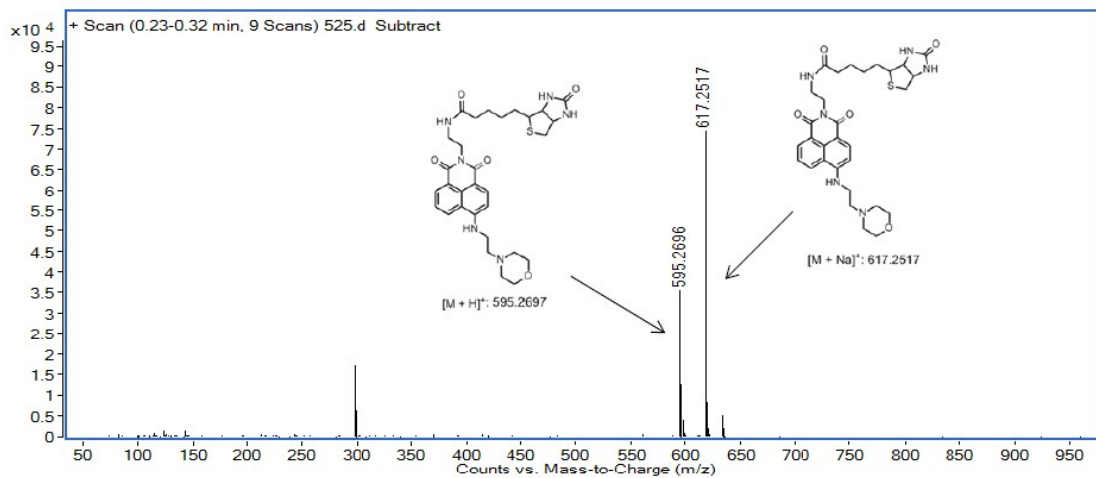

**Fig. S11** HRMS spectrum of **BN-lys**.
